# Supplementary material for: Characterization and Protective Activity of Monoclonal Antibodies Directed against Streptococcus suis Serotype 2 Capsular Polysaccharide Obtained Using a Glycoconjugate
Source: MDPI journal article supplement (doi:10.3390/pathogens8030139), 2019-09-07
Supplement: s1 [file s1]

# SUPPLEMENTARY MATERIAL

---

## Characterization and protective activity of monoclonal antibodies directed against *Streptococcus suis* serotype 2 capsular polysaccharide obtained using a glycoconjugate

Guillaume Goyette-Desjardins <sup>1,2,3,4</sup>, Sonia Lacouture <sup>1,2</sup>, Jean-Philippe Auger <sup>1,2,3</sup>, René Roy <sup>2,3,4</sup>, Marcelo Gottschalk <sup>1,2,3,4</sup> and Mariela Segura <sup>1,2,3,4\*</sup>

<sup>1</sup> Research Group on Infectious Diseases in Production Animals, Faculty of Veterinary Medicine, University of Montreal, St-Hyacinthe, Quebec, Canada

<sup>2</sup> Swine and Poultry Infectious Diseases Research Centre, Quebec, Canada

<sup>3</sup> Pharmaqam, Université du Québec à Montréal, Montreal, Quebec, Canada

<sup>4</sup> Canadian Glycomics Network (GlycoNet), University of Alberta, Edmonton, Alberta, Canada

\* Correspondence: mariela.segura@umontreal.ca; Tel.: +1-450-773-8521 (ext. 0080)

**Table S1.** Anti-CPS titers of mAb-containing supernatants for the determination of their immunoglobulin classes.

| <b>Antibody</b>           |           |             |            |                |
|---------------------------|-----------|-------------|------------|----------------|
| <b>Isotype / Subclass</b> | <b>Z3</b> | <b>13C8</b> | <b>9E7</b> | <b>16H11</b>   |
| IgM                       | 9084      | 107         | 112        | 0 <sup>1</sup> |
| IgG                       | 0         | 0           | 0          | 89             |
| IgG1                      | 0         | 0           | 0          | 68             |
| IgG2a                     | 0         | 0           | 0          | 0              |
| IgG2b                     | 0         | 0           | 0          | 0              |
| IgG3                      | 0         | 0           | 0          | 0              |
| <b>Conclusion</b>         | IgM       | IgM         | IgM        | IgG1           |

<sup>1</sup> 0 indicates that the titer is negative.

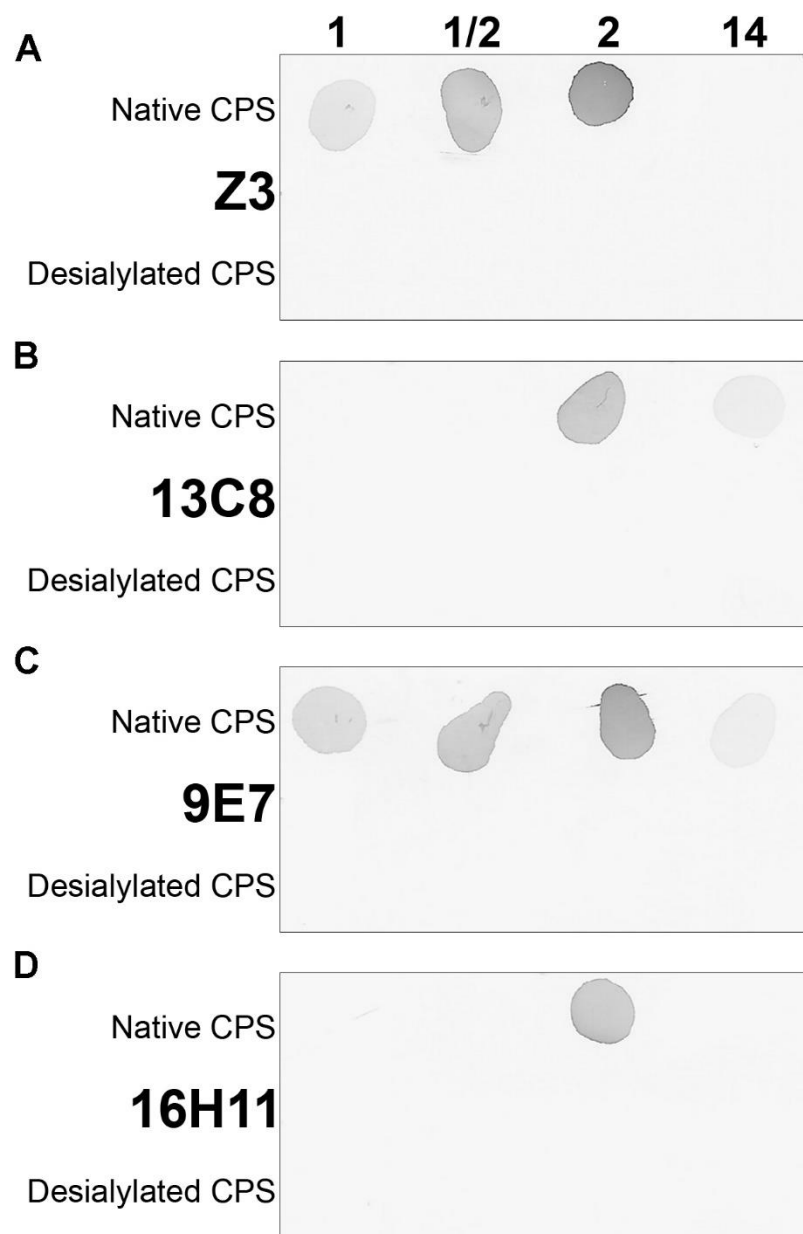

**Figure S1.** Specificity of mAbs for the capsular sialic acid. Dot-blot analyses with 10  $\mu$ g of either native or desialylated CPSs from serotypes 1, 1/2, 2, or 14 using different mouse mAb culture supernatants: mAb Z3 (A), mAb 13C8 (B), mAb 9E7 (C), or mAb 16H11 (D).

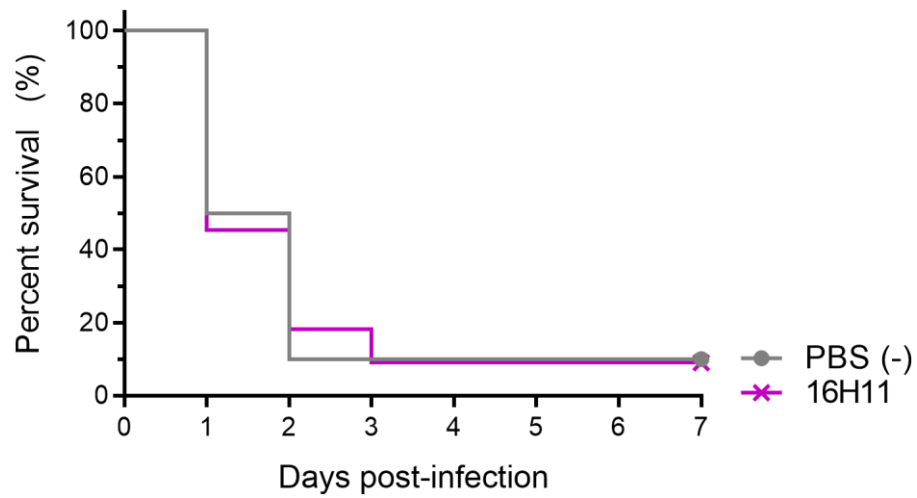

**Figure S2.** Passive immunization of CD-1 mice with murine IgG1 mAb 16H11 and survival after lethal challenge with *S. suis* type 2. Mice (n = 10) received doses of 20 µg of purified mAb intraperitoneally 1 h prior to the challenge. Mice were then challenged with a LD90 dose of  $1 \times 10^8$  CFU of *S. suis* serotype 2 strain P1/7 by intraperitoneal inoculation. Negative control used for protection was PBS.

**Figure S3.** Staining controls for the phagocytosis of *S. suis* serotype 2 by confocal laser scanning microscopy (Fig. 7). *S. suis* opsonized with positive rabbit sera (A, B) or sterile culture media (C) was added to cells. After a bacteria–cell contact of 1 h, cells were fixed and stained as follows: (A) cells were labelled with rabbit serum against *S. suis* followed by an anti-rabbit IgG (Alexa-Fluor 488, green) then stained with DAPI (blue); (B) cells were labelled with serum against *S. suis* (no conjugate) and a mAb specific for LAMP-1 (Alexa-Fluor 647, red), then stained with DAPI; (C) cells were labelled with rabbit serum against *S. suis* followed by an anti-rabbit IgG (Alexa-Fluor 488) and a mAb specific for LAMP-1 (Alexa-Fluor 647), then stained with DAPI. Scale bar = 5  $\mu$ m.

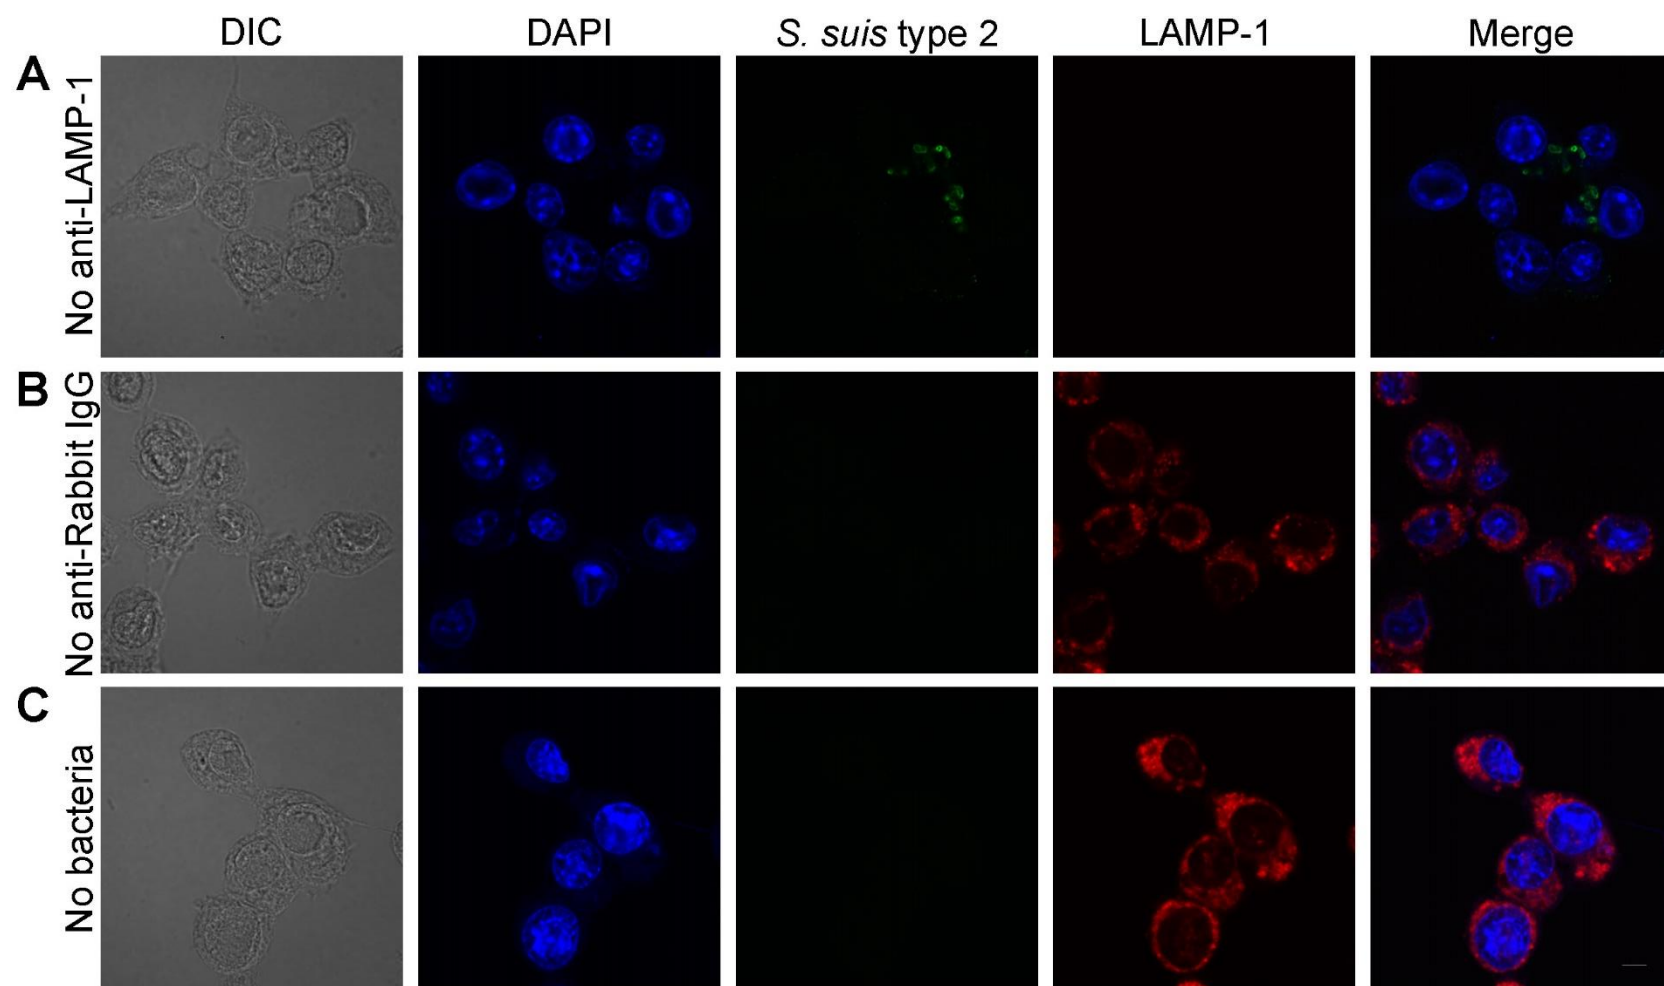

Figure S3
